1 Structure and reconstitution of a hydrolase complex that releases  
2 peptidoglycan from the membrane after polymerization

3  
4 Authors: Kaitlin Schaefer,<sup>1‡</sup> Tristan W. Owens,<sup>2‡</sup> Julia E. Page,<sup>1</sup> Marina Santiago,<sup>1</sup>  
5 Daniel Kahne,<sup>2</sup> Suzanne Walker<sup>1\*</sup>

6  
7  
8 Affiliations:

9 <sup>1</sup> Department of Microbiology, Harvard Medical School, Boston, Massachusetts 02115

10 <sup>2</sup> Department of Chemistry and Chemical Biology, Harvard University, Cambridge,  
11 Massachusetts 02138

12  
13 ‡ These authors contributed equally.

14 \*Correspondence to: [suzanne\\_walker@hms.harvard.edu](mailto:suzanne_walker@hms.harvard.edu)

15

16

17 **Bacteria are surrounded by a peptidoglycan cell wall that is essential for**  
18 **their survival<sup>1</sup>. During cell wall assembly, a lipid-linked disaccharide-peptide**  
19 **precursor called Lipid II is polymerized and crosslinked to produce mature**  
20 **peptidoglycan. As Lipid II is polymerized, nascent polymers remain membrane-**  
21 **anchored at one end and the other end becomes crosslinked to the matrix<sup>2-4</sup>. A**  
22 **longstanding question is how bacteria release newly synthesized peptidoglycan**  
23 **strands from the membrane to complete the synthesis of mature peptidoglycan.**  
24 **Here we show that a *Staphylococcus aureus* cell wall hydrolase and a membrane**  
25 **protein containing eight transmembrane helices form a complex that acts as a**  
26 **peptidoglycan release factor. The complex cleaves nascent peptidoglycan**  
27 **internally to produce free oligomers as well as lipid-linked oligomers that can**  
28 **undergo further elongation. The polytopic membrane protein, which is similar to a**  
29 **eukaryotic CAAX protease, controls the length of these products. A 2.6 Å**  
30 **resolution structure of the complex shows that the membrane protein scaffolds the**  
31 **hydrolase to orient its active site for cleavage of the glycan strand. We propose**  
32 **that this complex serves to detach newly-synthesized peptidoglycan polymer from**  
33 **the cell membrane to complete integration into the cell wall matrix.**

34

35 The biosynthesis of the bacterial cell wall has been the focus of intense study for  
36 decades.<sup>1</sup> The peptidoglycan precursor Lipid II is synthesized inside the cell, transported  
37 across the cytoplasmic membrane,<sup>5,6</sup> and then assembled outside the cell into a  
38 crosslinked polymer that prevents osmotic lysis (Fig. 1a, left and middle panel)<sup>2</sup>. Two  
39 conserved families of peptidoglycan synthases carry out Lipid II polymerization and  
40 crosslinking<sup>2-4</sup>. These peptidoglycan synthases, particularly the transpeptidase (TP)  
41 components, have received a great deal of attention as targets for antibiotics. Indeed,  
42 transpeptidases are generically known as penicillin-binding proteins because they react  
43 covalently with beta-lactam antibiotics (PBPs)<sup>7</sup>. A necessary step in peptidoglycan  
44 biosynthesis that has received almost no attention is the release of newly synthesized  
45 peptidoglycan strands from the membrane (Fig. 1a, right panel). One way in which this

46 might be achieved is with a glycosidase that cleaves within a glycan strand to separate  
47 the end that has been crosslinked into the cell wall from the lipid-linked nascent oligomer  
48 that is not yet crosslinked.<sup>8</sup> Here, we describe a membrane protein complex comprising  
49 a glycosidase and a membrane protein that regulates its cleavage activity. This complex  
50 meets criteria for a peptidoglycan release factor and explains how nascent peptidoglycan  
51 is freed from the membrane in *S. aureus*.

52 To find genes important in cell wall assembly, we probed a *S. aureus* transposon  
53 library with sublethal concentrations of three different beta-lactams that have distinct PBP  
54 inhibition profiles (Fig. 1b)<sup>9-11</sup>. For *sagB*, encoding a membrane-anchored  
55 glucosaminidase that affects peptidoglycan strand length<sup>12-14</sup>, we observed an unusual  
56 response pattern in that transposon reads were strongly depleted in the presence of  
57 oxacillin and mecillinam, but enriched in the presence of cefoxitin (Fig. 1b; Supplementary  
58 Table 1). Only one other gene displayed the same pattern: *spdC*, encoding a membrane  
59 protein similar to eukaryotic CAAX proteases, enzymes that cleave prenylated proteins  
60 C-terminal to the site of prenylation. CAAX protease homologs are widespread in  
61 bacteria, but their roles have been unclear because protein prenylation is a modification  
62 not found in bacteria. Notably, *sagB* and *spdC* knockouts were reported in separate  
63 studies to share several distinctive phenotypes<sup>12,13,15,16</sup>. Together with the shared Tn-seq  
64 profiles, these joint phenotypes led us to think SagB and SpdC may act in a complex.

65 To test whether SagB and SpdC form a complex, we expressed Myc-SpdC in *S.*  
66 *aureus*  $\Delta spdC$  and immunoprecipitated the tagged protein from solubilized membranes.  
67 Polyacrylamide gel electrophoresis (PAGE) of the sample showed a band that contained  
68 SagB as a major component (Fig. 1c; Supplementary Fig. 1, Supplementary Table 2).  
69 Based on this finding, we co-expressed SagB-His<sub>6</sub> and FLAG-SpdC in *E. coli* and purified  
70 a complex containing SpdC and SagB in a 1:1 ratio (Fig. 1c, and also see Supplementary  
71 Fig. 2). *S. aureus* contains only one other glucosaminidase with a transmembrane helix,  
72 SagA.<sup>12,13</sup> The protein is homologous to SagB but did not have the same profile in our  
73 Tn-seq experiments, and we were unable to copurify SpdC with SagA (Supplementary  
74 Fig. 3). Taken together, our experiments showed that SpdC and SagB form a stable,  
75 specific complex.

76 To determine whether SpdC affects SagB activity, we compared the cleavage  
77 activity of the complex and SagB alone. We incubated the enzyme or enzyme complex  
78 with uncrosslinked peptidoglycan prepared in vitro from synthetic [<sup>14</sup>C]-Lipid II<sup>17-19</sup> and  
79 analyzed the reactions via PAGE-autoradiography (Fig. 2, and see Supplementary Fig.  
80 4). Consistent with previous findings, SagB lacking its TM helix has low activity (Fig. 2b,  
81 lane 6; also Supplementary Fig. 5)<sup>13,20</sup>. In contrast, full-length SagB fully converted the  
82 peptidoglycan oligomers to diffuse bands high in the gel (Fig. 2b, lane 4). SagA produced  
83 similar product bands. These were found to be short cleavage products ranging from two  
84 to eight sugars in length (Supplementary Fig. 6). The SagB-SpdC complex also produced  
85 short oligosaccharides, but they were longer on average than those produced by SagB  
86 alone (Supplementary Fig. 6); moreover, we observed an accumulation of faster-  
87 migrating cleavage products not observed for SagB alone (Fig. 2b). We observed a  
88 similar accumulation of fast-migrating products when the native *S. aureus* substrate was  
89 used to make peptidoglycan polymer (Supplementary Fig. 7).

90 We next sought to identify the cleavage fragments that uniquely accumulate for  
91 the SagB-SpdC complex. Their migration behavior suggested these fragments may still

92 contain the diphospholipid anchor at the reducing end. Because peptidoglycan  
93 glycosyltransferases (GTs) add Lipid II to the reducing end of the growing polymer<sup>21-23</sup>,  
94 one way to test if the SagB-SpdC cleavage products retain the diphospholipid is to  
95 determine whether they are competent substrates for polymer extension (Fig. 2d).  
96 Therefore, we prepared radiolabeled peptidoglycan oligomers, cleaved them with SagB-  
97 SpdC, incubated the cleavage products with *S. aureus* PBP2 and cold Lipid II, and  
98 analyzed the products by PAGE autoradiography (Fig. 2d). The SagB-SpdC cleavage  
99 products shifted to higher molecular weight bands, showing they were competent  
100 substrates and implying the presence of a diphospholipid at the reducing end.  
101 Furthermore, when we treated the cleavage products with the bacteriocin colicin M, which  
102 removes the lipid, we observed that the cleavage products migrated more slowly by SDS-  
103 PAGE (Fig. 2e; Supplementary Fig. 8-10).<sup>24,25</sup> LC-MS analysis confirmed the presence of  
104 a diphosphate on a peptidoglycan fragment having an odd number of sugars, consistent  
105 with glucosaminidase cleavage to leave a terminal MurNAc (Supplementary Fig. 10).  
106 Notably, SagB-SpdC's cleavage activity *in vitro* depended on the conserved catalytic  
107 glutamate<sup>13,2613,2613,2513,25,20</sup> in SagB (E155), but not on an SpdC residue conserved in  
108 eukaryotic CAAX proteases and required for their proteolytic activity (Supplementary Fig.  
109 11). Moreover, cellular phenotypes of the SagB catalytic mutant resemble a *sagB*  
110 knockout, whereas SpdC mutants lacking putative catalytic residues resemble wild-type  
111 (Supplementary Fig. 12)<sup>15</sup>. These findings show that SagB plays a catalytic role in  
112 peptidoglycan cleavage while SpdC plays a noncatalytic role in controlling SagB. While  
113 we cannot exclude the possibility that SpdC has a catalytic function, its known *in vitro* and  
114 cellular phenotypes involve noncatalytic functions.

115 These results show that the SagB-SpdC complex satisfies criteria expected for a  
116 peptidoglycan release factor. First, the complex yields products that contain a reducing-  
117 end lipid; second, these products are capable of further elongation. SagB's known effect  
118 on glycan strand length may also be due to its role as part of a release factor complex. If  
119 so, we would expect the loss of SpdC to similarly affect glycan strand length. By  
120 comparing glycan strands isolated from wild-type,  $\Delta$ *sagB*, and  $\Delta$ *spdC* cells, we found that  
121 the short glycan strands characteristic of wild-type *S. aureus* are lost in both the  $\Delta$ *sagB*  
122 and  $\Delta$ *spdC* mutants (Supplementary Fig. 13), showing that SpdC is also involved in  
123 glycan strand length control in cells. We would also expect SagB-SpdC to act on newly  
124 synthesized sections of peptidoglycan polymer that are not yet modified or crosslinked  
125 into the matrix because both proteins are anchored in the membrane. Consistent with this  
126 expectation, we observed a clear preference for cleavage of nascent, unmodified  
127 peptidoglycan over peptidoglycan that contained teichoic acid modifications or crosslinks  
128 (Supplementary Fig. 14 and 15). Our conclusion that SagB-SpdC acts early in the  
129 peptidoglycan maturation pathway is supported by recent studies that used atomic force  
130 microscopy to visualize SagB mutants<sup>14</sup>.

131 To understand how SpdC interacts with SagB to control cleavage of nascent  
132 polymer, we solved the structure of SagB complexed with a truncated form of SpdC  
133 (SpdC<sup>1-256</sup>) that lacks the cytoplasmic C-terminal domain (Fig. 3a-c; Supplementary Fig.  
134 17)<sup>15</sup>. Removal of this apparently unstructured domain did not affect formation of the  
135 complex or change its *in vitro* activity, nor did it impact cellular phenotypes of SpdC  
136 (Supplementary Fig. 11, 16, 17). We refer hereafter to this truncated complex simply as  
137 SagB-SpdC. Our structure, obtained using lipidic cubic phase (LCP) crystallography<sup>27</sup>,

138 resolves nearly all of SpdC, which contains 8 transmembrane helices linked by short  
139 extracellular and cytoplasmic loops, as well as the transmembrane helix and  
140 glucosaminidase domain of SagB (Fig. 3c).

141 SagB makes contacts to SpdC on both its extracellular face and in the membrane  
142 (Fig. 3a-c). A helix and loop in SagB's glucosaminidase domain (residues 115 to 127) sit  
143 over the edge of the SpdC helical bundle and make extensive hydrogen bonding and ionic  
144 interactions with the surface-exposed loop between SpdC transmembrane helix 3 (TM3)  
145 and TM4 (Fig. 3b). Adjacent to this interface, the top of the SagB transmembrane helix  
146 also contacts the SpdC TM3-TM4 loop (Q33, Fig. 3b), and from there the SagB TM helix  
147 maintains tight hydrophobic contacts with SpdC TM3 across the membrane (Fig. 3c, and  
148 also see Supplementary Fig. 19). We found that the SagB TM helix is required to form  
149 the complex: SpdC did not co-purify with soluble SagB and swapping the TM helix of  
150 SagB with that of SagA greatly reduced stability of the complex (Supplementary Fig. 19).  
151 However, the SagB TM helix is not sufficient for robust complexation with SpdC; when  
152 we replaced the TM helix of SagA with that of SagB, they did not co-purify as a 1:1  
153 complex (Supplementary Fig. 19). Taken together, our results show that the  
154 transmembrane interactions are necessary to form a complex, but are not sufficient for  
155 the activity displayed by SagB-SpdC.

156 We thought the contacts at the extracellular SagB-SpdC interface could affect  
157 cleavage function and made mutations predicted to disrupt key interactions. SagA and  
158 SagB share the same fold and are 53% similar (Supplementary Fig. 3), but the  
159 extracellular residues in SagB that contact SpdC are not conserved in SagA. Replacing  
160 these residues on the extracellular SagB helix that contacts SpdC with the corresponding  
161 SagA residues (SagB<sup>115-SEVNQLKKG-123</sup>) did not prevent complex formation, which may be  
162 driven largely by the interactions between TM helices in the membrane; however, we  
163 observed an erosion of product length control (Fig. 3d, lane 5). We identified a possible  
164 salt bridge between SagB lysine 118 and SpdC aspartate 106 in the crystal structure (Fig.  
165 3b), and found that replacing either of these amino acids with a residue having the  
166 opposite charge also resulted in a product distribution more closely resembling that of  
167 purified SagB alone (Fig. 3d, lane 4). These results suggested that the relative orientation  
168 of SpdC and the SagB glucosaminidase domain is important for determining the product  
169 distribution.

170 To test whether the interface conformation observed in the crystal structure is  
171 critical for product length control, we generated disulfide-linked SagB-SpdC complexes  
172 using the crystal structure as a guide. We mutated proximal interface residues in SagB  
173 and SpdC to cysteines and purified the corresponding complexes (Supplementary Fig.  
174 20a). Both SagB<sup>N115C</sup>-SpdC<sup>S107C</sup> and SagB<sup>K118C</sup>-SpdC<sup>D106C</sup> complexes formed disulfide  
175 linkages as judged by SDS-PAGE analysis. Both disulfide-linked complexes produced an  
176 altered distribution of lipid-linked peptidoglycan products compared to wild-type (Fig. 3e  
177 and Supplementary Fig. 20), with a shift to longer products. By comparing the mobility of  
178 the lipid-linked SagB-SpdC cleavage products to Lipid II and short oligomers, we  
179 concluded that the cleavage products from the disulfide-bonded complexes have 9-13  
180 sugars (n=4-6; Supplementary Fig. 20). In an analogous experiment, unlabeled  
181 peptidoglycan oligomers were treated with wild-type or the disulfide-bonded complex,  
182 followed by ColM treatment and then LC-MS analysis. Similar to PAGE autoradiography,  
183 the predominant species were longer for the reaction with the disulfide-bonded complex



184 (Fig. 3e). These results show that restricting the orientation of the two proteins to that  
185 present in the crystal structure results in tighter length control. Noting that the crystal  
186 structure was obtained in a membrane-like environment, we infer that this orientation is  
187 relevant to the mechanism of cleavage in cells.

188 Our results suggest a mechanism for how SagB-SpdC generates the observed  
189 product lengths (Fig. 4). The structure of SpdC is similar to that of the CAAX protease  
190 Rce1 (Supplementary Fig. 21), which cleaves prenylated proteins just after the modified  
191 cysteine residue. The resemblance of SpdC to a CAAX protease suggests that SpdC may  
192 bind part of the lipid pyrophosphate carrier of nascent peptidoglycan. SpdC contains a  
193 cavity that opens to the membrane between TM1 and TM5, a possible site of prenyl chain  
194 entry. A groove extends from this opening along the extracellular face of SpdC all the way  
195 to the active site pocket of SagB. Several lines of evidence have established the  
196 directionality of oligosaccharide binding for the family of glucosaminidases to which SagB  
197 belongs<sup>28</sup>, and this directionality is consistent with nascent peptidoglycan following the  
198 groove such that the non-reducing end of the polymer exits toward the cell wall  
199 (Supplementary Fig. 22). Consistent with our model, we found that the distribution of  
200 nascent cleavage products was unchanged whether polymerase and SagB-SpdC were  
201 added simultaneously or sequentially (Supplementary Fig. 23). These results imply that  
202 cleavage occurred after polymer release from the polymerase, leaving the substrate lipid  
203 tail accessible for SpdC to bind. The product lengths observed *in vitro* are in good  
204 agreement with the lengths that would be predicted from the physical dimensions of the  
205 complex if the polymer tracks along the grooves in SpdC and SagB (Fig. 4b). To  
206 determine if SagB-SpdC activity depends on the presence of the lipid portion of oligomers,  
207 we pre-treated peptidoglycan with ColM and incubated the mixture with SagB-SpdC. As  
208 analyzed by PAGE autoradiography, SagB-SpdC activity is abrogated when oligomers  
209 lack the lipid, consistent with a role for the lipid in interacting with the complex  
210 (Supplementary Fig. 24). Obtaining a structure of SagB-SpdC bound to a lipid-linked  
211 nascent oligomer is now a key goal.

212 SagB-SpdC is the first example of a release factor complex shown to cleave  
213 nascent peptidoglycan from its membrane anchor, which would allow its full integration  
214 into the cell wall. As *S. aureus* can survive without SagB-SpdC, we infer that other  
215 peptidoglycan release factors exist, and some may also be membrane-anchored cell wall  
216 hydrolase complexes. We note that this first structure and biochemical analysis of a  
217 bacterial member of the CAAX protease family suggests that other CAAX protease  
218 homologs, which are widespread in bacteria, may also act to scaffold membrane proteins  
219 involved in cell envelope synthesis.

220  
221

## 222 **Acknowledgements**

223 We thank Dr. Samir Moussa for his preliminary experiments investigating the roles of  
224 SpdC and SagB. We also thank Dr. Andrew Kruse for helpful discussions on  
225 crystallography. This work used NE-CAT beamlines (GM103403), a Pilatus detector  
226 (RR029205), and an Eiger detector (OD021527) at the APS (DE-AC02-06CH11357).  
227 This research was supported by GM076710 and U19 AI109764 to D.K. and S.W. and  
228 T32GM007753 to J.E.P.

229 **Data availability**

230 Transposon sequencing data (BioProject accession number PRJNA573479) can be found  
231 in the NCBI BioProject database.

232 **Author contributions**

233 S.W., K.S., T.W.O., and J.E.P. designed experiments and analyzed the data with input  
234 from D.K. K.S. performed the biochemical experiments; K.S. and T.W.O. purified proteins  
235 and performed crystallographic experiments; J.E.P. analyzed transposon sequencing  
236 data, constructed *S. aureus* mutant strains, performed the spot dilutions, and performed  
237 the glycan strand experiment; S.W., K.S., T.W.O., J.E.P., and D.K. wrote the manuscript  
238 with input from all authors.

239 **Competing interests**

240 The authors declare no competing interests.

241

242

243

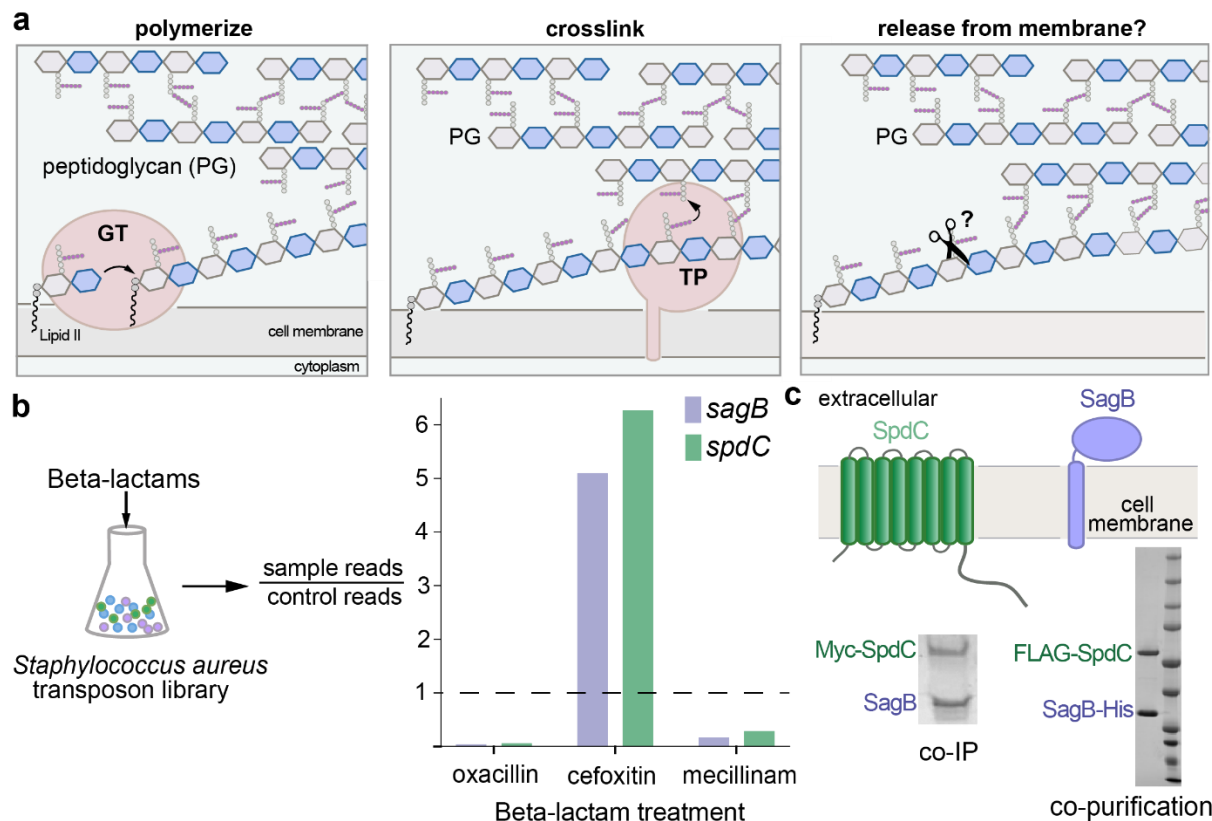

244

245 **Figure 1. The cell wall hydrolase SagB and the membrane protein SpdC form a complex.** **a**, Overview of the final  
 246 steps in peptidoglycan assembly. Left panel: After translocation to the outer face of the cytoplasmic membrane, the  
 247 peptidoglycan (PG) monomer Lipid II is polymerized into linear glycan strands by glycosyltransferases (GT). Middle  
 248 panel: Transpeptidase domains (TPs) crosslink glycan strands into the cell wall. Right panel: The glycan strand must  
 249 be released from the membrane through some type of cleavage process in order to be incorporated into the cell wall.  
 250 **b**, A *Staphylococcus aureus* transposon library<sup>9,10</sup> was treated with a panel of beta-lactams (oxacillin, cefoxitin,  
 251 mecillinam) that have different selectivities for the four native *S. aureus* penicillin-binding proteins (PBPs)<sup>11</sup>. Only two  
 252 genes, *sagB* and *spdC*, displayed a response pattern in which transposon reads were depleted under oxacillin and  
 253 mecillinam treatment but enriched under cefoxitin treatment. **c**, SagB is a membrane-anchored glucosaminidase<sup>12,13</sup>  
 254 and SpdC is an eight-pass membrane protein<sup>15</sup>. Myc-tagged SpdC was expressed in a  $\Delta spdC$  *S. aureus* strain and co-  
 255 immunoprecipitated from solubilized membranes. ("Co-IP", see also Supplementary Fig. 1). SagB was identified by LC-  
 256 MS-MS analysis (Supplementary Table 1). Tandem affinity purification of SagB-His<sub>6</sub> and FLAG-SpdC from *E. coli*  
 257 yielded a stable 1:1 complex ("co-purification", see also Supplementary Fig. 2).

258

259

260

261

262

263

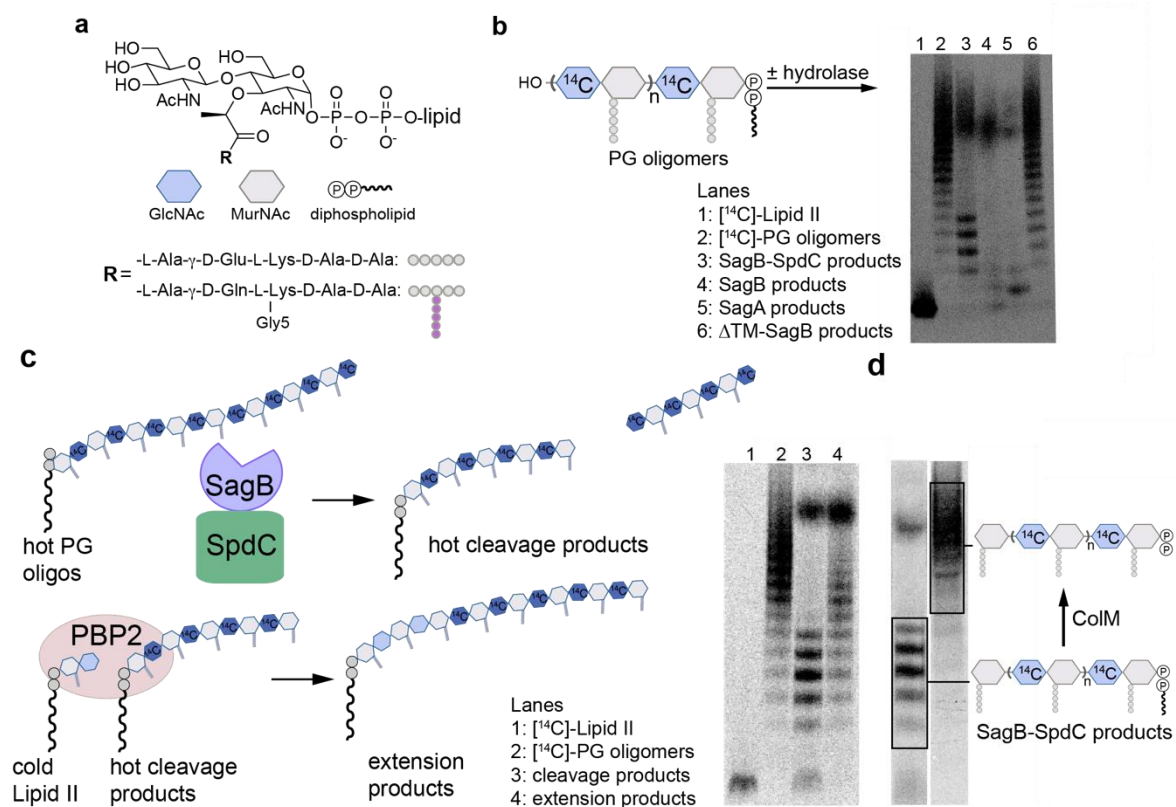

264  
 265 **Figure 2. *In vitro* reconstitution shows that SagB-SpdC cleaves nascent peptidoglycan to short lipid-linked**  
 266 **oligomers that can be elongated.** **a**, Chemical and cartoon representations of the synthetic Lipid II analog<sup>18</sup> and  
 267 native *S. aureus* Lipid II that were used to prepare peptidoglycan polymers in panels b-d. **b**, Radiolabeled peptidoglycan  
 268 polymers were incubated with the SagB-SpdC complex, SagB alone, SagA, or SagB lacking its transmembrane helix.  
 269 The signal towards the top of the autoradiograph in lanes 3-5 corresponds to short, lipid-free peptidoglycan fragments,  
 270 but the distribution of lengths differs (Supplementary Fig. 6). SagB-SpdC also produces a short ladder of radiolabeled  
 271 peptidoglycan fragments (see also Supplementary Fig. 5). **c**, Left: schematic of assay to determine whether SagB-  
 272 SpdC product bands contained a lipid-anchor. Right: Radiolabeled SagB-SpdC products were incubated with  
 273 unlabeled Lipid II and PBP2 and were extended to longer products. **d**, The bacteriocin colicin M (colM) de-lipidates  
 274 Lipid II and peptidoglycan oligomers, but leaves the anomeric diphosphate (Supplementary Figs. 8, 9)<sup>23,24</sup>.  
 275 Incubation of SagB-SpdC products (lane 3) with ColM (lane 4) resulted in the complete disappearance of fast-migrating bands and  
 276 the appearance of slower-migrating products. Product characterization by LC-MS confirmed the indicated structure  
 277 (Supplementary Fig. 10). The faster migration of the SagB-SpdC products containing a lipid may be due to SDS binding  
 278 to the lipid and increasing the net negative charge of these species.



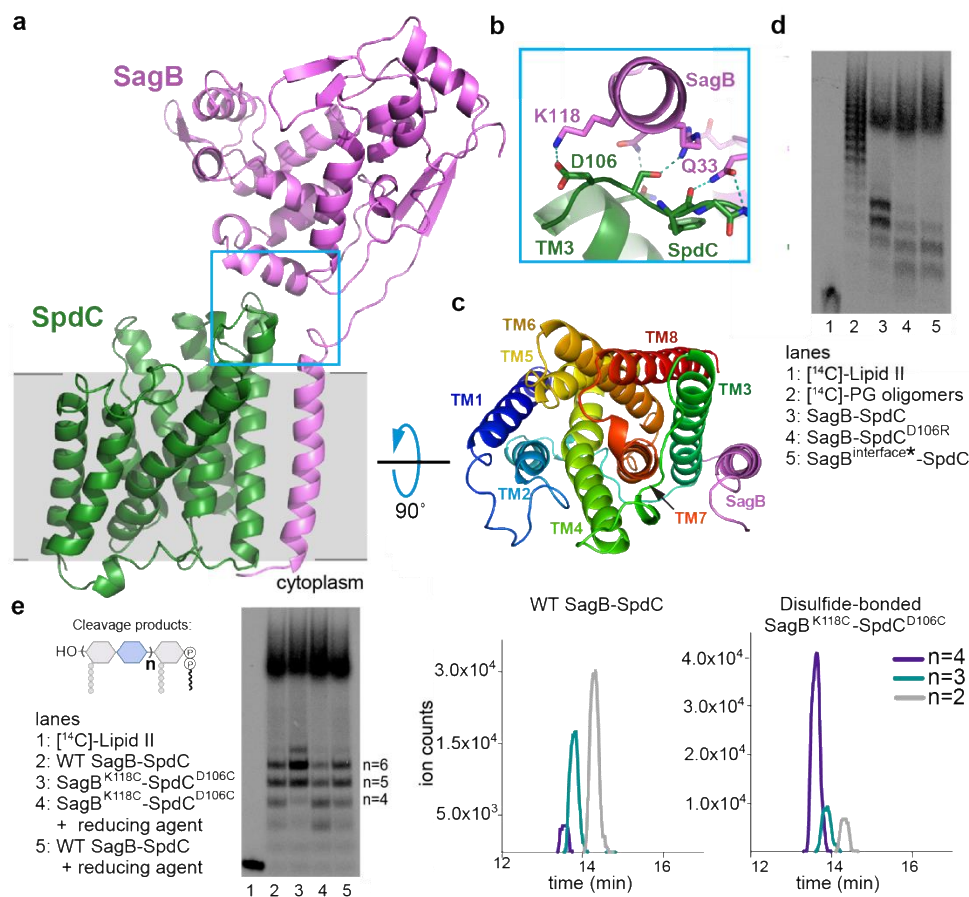

279  
 280  
 281  
 282  
 283  
 284  
 285  
 286  
 287  
 288  
 289  
 290  
 291  
 292  
 293  
 294  
 295  
 296

**Figure 3. A 2.6 Å resolution crystal structure of the SagB-SpdC complex establishes that two interfaces are critical for its function.** **a**, A cartoon representation of the SagB-SpdC crystal structure. The extracellular domains of both proteins interact (blue box); a helix at the bottom of the active site cleft of SagB (violet) contacts an extracellular loop between TM3 and TM4 of SpdC (green). The approximate location of the membrane is denoted in gray. **b**, Several hydrogen bonds and a salt-bridge form at the interface between the SagB helix and the SpdC loop. **c**, A view from the extracellular face of the transmembrane helices shows that SagB closely contacts TM3 of SpdC. SagB lacking its TM helix does not co-purify with SpdC (Supplementary Fig. 19). **d** and **e**, Radiolabeled peptidoglycan oligomers were incubated with SagB-SpdC or with constructs containing mutations designed to either disrupt or stabilize the extracellular interface between SagB and SpdC. **d**, SagB<sup>interface\*</sup> denotes SagB<sup>N115S, K118N, R119Q, V122D, D123G, L127E</sup>, in which SagB residues at the interface were switched to the corresponding SagA residues. **e**, A variant of SagB-SpdC with two cysteine-substituted residues, SagB<sup>K118C</sup>-SpdC<sup>D106C</sup>, was purified as the disulfide-linked complex (Supplementary Fig 20). Activity of the oxidized complex (lane 3) was compared to the activity of SagB<sup>K118C</sup>-SpdC<sup>D106C</sup> incubated with reducing agent (lane 4), and to wild-type SagB-SpdC without and with reducing agent (lanes 2 and 5). Unlabeled cleavage products were also treated with ColM and analyzed using LC-MS analysis. Extracted ion chromatogram (EIC) traces are shown for both wild-type SagB-SpdC and SagB<sup>K118C</sup>-SpdC<sup>D106C</sup> reactions, and further confirm that longer oligosaccharide products are preferred for a disulfide-restricted complex. Notably, short oligosaccharides ionize better relative to longer oligosaccharides.

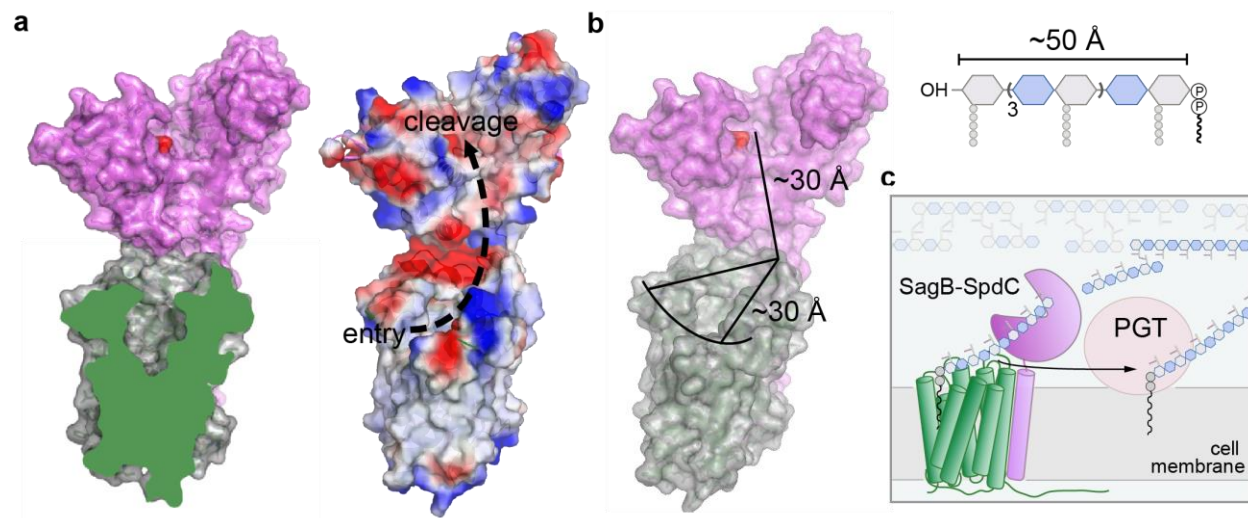

297

298 **Figure 4. SagB-SpdC is a peptidoglycan release factor that cleaves at a defined length from the reducing end**  
299 **to allow strands to be fully incorporated into the cell wall.** **a**, A cross-section of SpdC shows a groove that extends  
300 from the membrane and into the SagB catalytic groove (also see Supplementary Fig. 21d). As depicted by electrostatic  
301 surface potential, SpdC provides a path for a glycan strand that extends from an “entry” point in the membrane and into  
302 the “cleavage” site as denoted by the catalytic glutamate (red). **b**, Measuring the distance along this path provides  
303 approximately equivalent lengths required for binding a glycan strand that represents the average lipid-linked product  
304 lengths observed for the SagB-SpdC complex. **c**, Scheme depicting the proposed mode by which SagB-SpdC could  
305 act as peptidoglycan release factor. To prevent wasteful release of lipid-free peptidoglycan fragments, SagB-SpdC  
306 cleaves short strands that are being or have been crosslinked into the cell wall matrix; lipid-linked peptidoglycan  
307 products can be further elongated by peptidoglycan polymerases (PGTs).  
308

309

310

311

312

313

314

315

316

317

318

319

320

321

322

323

324

325

326

327

328

329

330  
331  
332  
333  
334  
335  
336  
337  
338  
339  
340  
341  
342  
343  
344  
345  
346  
347  
348  
349  
350  
351  
352  
353  
354  
355  
356  
357  
358  
359  
360  
361  
362  
363  
364  
365  
366  
367  
368  
369  
370  
371  
372  
373  
374  
375  
376  
377  
378  
379  
380  
381  
382

References:

- 1 Silhavy, T. J., Kahne, D. & Walker, S. The bacterial cell envelope. *Cold Spring Harb. Perspect. Biol.* **2**, a000414, doi:10.1101/cshperspect.a000414 (2010).
- 2 Vollmer, W., Blanot, D. & de Pedro, M. A. Peptidoglycan structure and architecture. *FEMS Microbiol. Rev.* **32**, 149-167, doi:10.1111/j.1574-6976.2007.00094.x (2008).
- 3 Meeske, A. J. *et al.* SEDS proteins are a widespread family of bacterial cell wall polymerases. *Nature* **537**, 634-638, doi:10.1038/nature19331 (2016).
- 4 Taguchi, A. *et al.* FtsW is a peptidoglycan polymerase that is functional only in complex with its cognate penicillin-binding protein. *Nat. Microbiol.* **4**, 587-594, doi:10.1038/s41564-018-0345-x (2019).
- 5 Sham, L. T. *et al.* Bacterial cell wall. MurJ is the flippase of lipid-linked precursors for peptidoglycan biogenesis. *Science* **345**, 220-222, doi:10.1126/science.1254522 (2014).
- 6 Ruiz, N. Bioinformatics identification of MurJ (MviN) as the peptidoglycan lipid II flippase in *Escherichia coli*. *Proc. Natl. Acad. Sci. USA* **105**, 15553-15557, doi:10.1073/pnas.0808352105 (2008).
- 7 Sauvage, E., Kerff, F., Terrak, M., Ayala, J. A. & Charlier, P. The penicillin-binding proteins: structure and role in peptidoglycan biosynthesis. *FEMS Microbiol. Rev.* **32**, 234-258, doi:10.1111/j.1574-6976.2008.00105.x (2008).
- 8 Yunck, R., Cho, H. & Bernhardt, T. G. Identification of MltG as a potential terminase for peptidoglycan polymerization in bacteria. *Mol. Microbiol.* **99**, 700-718, doi:10.1111/mmi.13258 (2016).
- 9 Santiago, M. *et al.* Genome-wide mutant profiling predicts the mechanism of a Lipid II binding antibiotic. *Nat. Chem. Biol.* **14**, 601-608, doi:10.1038/s41589-018-0041-4 (2018).
- 10 Santiago, M. *et al.* A new platform for ultra-high density *Staphylococcus aureus* transposon libraries. *BMC Genomics* **16**, 252, doi:10.1186/s12864-015-1361-3 (2015).
- 11 Georgopapadakou, N. H., Smith, S. A. & Bonner, D. P. Penicillin-binding proteins in a *Staphylococcus aureus* strain resistant to specific beta-lactam antibiotics. *Antimicrob. Agents Chemother.* **22**, 172-175, doi:10.1128/aac.22.1.172 (1982).
- 12 Wheeler, R. *et al.* Bacterial Cell Enlargement Requires Control of Cell Wall Stiffness Mediated by Peptidoglycan Hydrolases. *MBio* **6**, e00660, doi:10.1128/mBio.00660-15 (2015).
- 13 Chan, Y. G., Frankel, M. B., Missiakas, D. & Schneewind, O. SagB Glucosaminidase Is a Determinant of *Staphylococcus aureus* Glycan Chain Length, Antibiotic Susceptibility, and Protein Secretion. *J. Bacteriol.* **198**, 1123-1136, doi:10.1128/JB.00983-15 (2016).
- 14 Pasquina-Lemonche, L. *et al.* The architecture of the Gram-positive bacterial cell wall. *Nature*, doi:10.1038/s41586-020-2236-6 (2020).
- 15 Grundling, A., Missiakas, D. M. & Schneewind, O. *Staphylococcus aureus* mutants with increased lysostaphin resistance. *J. Bacteriol.* **188**, 6286-6297, doi:10.1128/JB.00457-06 (2006).
- 16 Poupel, O., Proux, C., Jagla, B., Msadek, T. & Dubrac, S. SpdC, a novel virulence factor, controls histidine kinase activity in *Staphylococcus aureus*. *PLoS. Pathog.* **14**, e1006917, doi:10.1371/journal.ppat.1006917 (2018).
- 17 Schaefer, K., Matano, L. M., Qiao, Y., Kahne, D. & Walker, S. In vitro reconstitution demonstrates the cell wall ligase activity of LCP proteins. *Nat. Chem. Biol.* **13**, 396-401, doi:10.1038/nchembio.2302 (2017).
- 18 Ye, X. Y. *et al.* Better substrates for bacterial transglycosylases. *J. Am. Chem. Soc.* **123**, 3155-3156, doi:10.1021/ja010028q (2001).
- 19 Qiao, Y. *et al.* Lipid II overproduction allows direct assay of transpeptidase inhibition by beta-lactams. *Nat. Chem. Biol.* **13**, 793-798, doi:10.1038/nchembio.2388 (2017).
- 20 Pintar, S., Borisek, J., Usenik, A., Perdih, A. & Turk, D. Domain sliding of two *Staphylococcus aureus* N-acetylglucosaminidases enables their substrate-binding prior to its catalysis. *Commun. Biol.* **3**, 178, doi:10.1038/s42003-020-0911-7 (2020).

- 383 21 Perlstein, D. L., Zhang, Y., Wang, T. S., Kahne, D. E. & Walker, S. The direction of glycan chain  
384 elongation by peptidoglycan glycosyltransferases. *J. Am. Chem. Soc.* **129**, 12674-12675,  
385 doi:10.1021/ja075965y (2007).
- 386 22 Wang, T. S. *et al.* Primer preactivation of peptidoglycan polymerases. *J. Am. Chem. Soc.* **133**,  
387 8528-8530, doi:10.1021/ja2028712 (2011).
- 388 23 Welsh, M. A., Schaefer, K., Taguchi, A., Kahne, D. & Walker, S. The direction of chain growth and  
389 substrate preferences of SEDS-family peptidoglycan glycosyltransferases. *J. Am. Chem. Soc.*,  
390 doi:10.1021/jacs.9b06358 (2019).
- 391 24 El Ghachi, M. *et al.* Colicin M exerts its bacteriolytic effect via enzymatic degradation of  
392 undecaprenyl phosphate-linked peptidoglycan precursors. *J. Biol. Chem.* **281**, 22761-22772,  
393 doi:10.1074/jbc.M602834200 (2006).
- 394 25 Touze, T. *et al.* Colicin M, a peptidoglycan lipid-II-degrading enzyme: potential use for antibacterial  
395 means? *Biochem. Soc. Trans.* **40**, 1522-1527, doi:10.1042/BST20120189 (2012).
- 396 26 Alcorlo, M., Martinez-Caballero, S., Molina, R. & Hermoso, J. A. Carbohydrate recognition and lysis  
397 by bacterial peptidoglycan hydrolases. *Curr. Opin. Struct. Biol.* **44**, 87-100,  
398 doi:10.1016/j.sbi.2017.01.001 (2017).
- 399 27 Caffrey, M. & Cherezov, V. Crystallizing membrane proteins using lipidic mesophases. *Nat. Protoc.*  
400 **4**, 706-731, doi:10.1038/nprot.2009.31 (2009).
- 401 28 Mihelic, M. *et al.* The mechanism behind the selection of two different cleavage sites in NAG-NAM  
402 polymers. *IUCrJ* **4**, 185-198, doi:10.1107/S2052252517000367 (2017).
- 403  
404

## 405 **Methods and Materials**

### 406 **Materials**

407  
408  
409 All reagents and chemicals were purchased from Sigma-Aldrich unless indicated  
410 otherwise. Lysostaphin was purchased from Ambicin. *Staphylococcus aureus* was grown  
411 in tryptic soy broth (TSB) with aeration or on TSB with 1.5% agar at 30 or 37°C. Antibiotics  
412 were used at the following concentrations for *S. aureus* strains: kanamycin (50 µg/mL),  
413 neomycin (50 µg/mL), tetracycline (3 µg/mL), chloramphenicol (10 µg/mL), and  
414 erythromycin (10 µg/mL). NovaBlue (DE3) *Escherichia coli* (*E. coli*) strains were grown in  
415 Lysogeny broth (LB). BL21(DE3) *E. coli* strains were grown in terrific broth at  
416 temperatures between 18°C and 37°C as described below. Native Lipid II was extracted  
417 from *Staphylococcus aureus* as previously described<sup>19</sup>. Synthetic Lipid II was prepared  
418 as previously described<sup>18</sup>. The radiolabeled wall teichoic acid (WTA) precursor, [<sup>14</sup>C]-  
419 LII<sub>A</sub><sup>WTA</sup>, was prepared as previously reported<sup>17</sup>. Fmoc-Biotin-D-Lysine (BDL) was used  
420 to prepare BDL<sup>29</sup>. PBP2<sup>S398G</sup>, SgtB<sup>Y181D</sup>, EfPBPX, and TagT were expressed and purified

421 as described in previous methods<sup>19,30-32</sup>. Colicin M was expressed and purified as  
422 previously described<sup>5</sup>. LytA was expressed and purified as previously described<sup>33</sup>.

## 423 **Methods**

### 424 **Beta-lactam treatment and sequencing of a methicillin-resistant *Staphylococcus*** 425 ***aureus* transposon library**

426  
427 We created a high-density transposon library in *S. aureus* USA300 by phage-  
428 based transposition as previously described<sup>9,10,34</sup>. The transposon library was treated with  
429 beta-lactams (8 µg mL<sup>-1</sup> for mecillinam, 0.4 µg mL<sup>-1</sup> for cefoxitin, and 0.1 µg mL<sup>-1</sup> for  
430 oxacillin) at 37°C. A low concentration of oxacillin was chosen to identify factors important  
431 for beta lactam resistance. For mecillinam and cefoxitin, the concentrations were chosen  
432 such that only one PBP should be significantly inhibited in each condition. For mecillinam,  
433 the concentration was that at which the treated cells phenocopied a *pbp3* mutant at 43  
434 °C. For cefoxitin, the concentration was that which sensitized cells to oxacillin to the same  
435 degree as a *pbp4* mutant. Cultures were shaken until A<sub>280</sub>=1-2.0. Cells were spun down,  
436 and DNA was isolated in preparation for Tn-Seq as previously described. Using reported  
437 methods<sup>9,10</sup>, genes significantly enriched and depleted under cefoxitin, mecillinam, or  
438 oxacillin conditions were identified using a two-sided Mann-Whitney U test corrected for  
439 multiple hypothesis testing using the Benjamini-Hochberg method. A gene was  
440 considered to be enriched if the treated:control read ratio was greater than five and  
441 depleted if the treated:control read ratio was less than 0.1. For mecillinam, the cut-off for  
442 depletion was loosened to 0.3, as mecillinam was moderately selective. Scripts for this  
443 analysis can be found at <https://github.com/SuzanneWalkerLab/TnSeqMOAPrediction>.

### 445 **Plasmid construction for *S. aureus* strains**

446  
447 *pKFC\_spdC\_kan*



448  
449           The kan<sup>R</sup> marker (primers SM45 and SM46) and the 1-kb sequences upstream  
450 (primers SM43 and SM44) and downstream (primers SM47 and SM48) of the *spdC* open  
451 reading frame were amplified by PCR and stitched together by overlap PCR. The resulting  
452 fragment was cloned between the BamHI and Sall restriction sites of pKFC.<sup>35</sup>

#### 453 *pKFC\_spdC*

454           The 700-bp sequences upstream (primers SM1 and SM2) and downstream  
455 (primers SM3 and SM4) of the *spdC* open reading frame were amplified by PCR and  
456 stitched together by overlap PCR. The resulting fragment was cloned between the BamHI  
457 and Sall restriction sites of pKFC.

#### 458 *pJP47*

459           The pTarKO vector was linearized with primers F\_pKTarO and R\_pKTarO using  
460 the plasmid pTD47<sup>36</sup> as a template. The 1-kb sequences upstream (primers  
461 F\_1kb+\_sagB and R\_1kb+\_sagB) and downstream (F\_1kb(-)\_sagB and R\_1kb(-)\_sagB)  
462 of the *sagB* open reading frame were amplified by PCR. Overlap PCR was performed to  
463 assemble these fragments with the tet<sup>R</sup> marker, and then the resulting fragment was  
464 ligated into the plasmid backbone between the restriction sites BamHI and Sall. Then,  
465 the tet<sup>R</sup> marker (primers oJP51 and oJP52) and upper homology arm (primers oJP54 and  
466 oJP33) were sequentially replaced by Takara Bio In-Fusion seamless cloning after  
467 linearizing the plasmid with primers oJP49 and oJP50 and oJP53 and oTD145  
468 respectively. The insert containing the *sagB* homology arms and tet<sup>R</sup> marker was  
469 amplified with primers oJP32 and oJP35 and cloned between the BamHI and Sall  
470 restriction sites in pKFC. To exchange the tet<sup>R</sup> marker for a kan<sup>R</sup> marker, this plasmid  
471 was linearized with primers oJP79 and oJP80. The linearized DNA was phosphorylated

472 at the 5' ends using T4 polynucleotide kinase, and the ends were ligated to produce  
473 circular DNA. The kan<sup>R</sup> marker (primers oTD73 and oTD74) was then cloned into the  
474 plasmid at the XbaI restriction site. Finally the insert containing the *sagB* homology arms  
475 and the kan<sup>R</sup> marker was amplified with primers oJP32 and oJP35 and cut into the  
476 pTarkO backbone between the BamHI and Sall restriction sites<sup>37</sup>.

#### 477 *pSM\_spdC\_myc*, *pJP17*, and *pJP42*

478 For pSM\_spdC\_myc and pJP42, the full or truncated *spdC* gene sequence with its  
479 native ribosome-binding site (-17) was amplified from HG003 *S. aureus* genomic DNA  
480 and an amino-terminal cMyc tag appended by PCR using primers SM165 and SM166 for  
481 pSM\_spdC\_myc and primers oJP25 and oJP81 for pJP42. The fragments were then  
482 cloned between the KpnI and BlnI restriction sites of pTP63.<sup>38</sup> For pJP17, the cMyc-*spdC*  
483 fragment with the native ribosome binding site was amplified from pSM\_spdC\_myc using  
484 primers oJP25 and oJP26 and cloned between the KpnI and BlnI restriction sites of  
485 pTP63.

#### 486 *pSM\_spdC\_his*

487 The *spdC* gene and native ribosome-binding site was amplified from HG003 *S.*  
488 *aureus* genomic DNA and a carboxy-terminal hexa-histidine tag was appended by PCR  
489 with primers SM124 and SM125. This fragment was cloned between the KpnI and BlnI  
490 restriction sites of pTP63.

#### 491 *pSM\_spdC\_E135A*, *pSM\_spdC\_R139A*, *pSM\_spdC\_H210A*

492 These three plasmids were constructed using QuikChange site-directed  
493 mutagenesis with primers SM130 and SM131, SM132 and SM133, and SM134 and  
494 SM135 respectively and *pSM\_spdC\_his* as a template.

495 *pJP15 and pJP19*

496 The *sagB* or *sagB E155A* gene sequence with a carboxy-terminal hexa-histidine tag was  
497 amplified from *pspdC\_sagB* or *pspdC\_sagB<sup>E155A</sup>* respectively and the native ribosome  
498 binding site appended by PCR with primers oJP21 and oJP22. The fragments were  
499 cloned between the KpnI and BlnI restriction sites in pTP63.

500 *pJP22*

501 A gBlock gene fragment was synthesized by IDT. The fragment was amplified with  
502 primers oJP30 and oJP31 and cloned between the KpnI and BlnI restriction sites in  
503 pTP63.

504

#### 505 ***S. aureus* strain construction**

506

507 pKFC\_*spdC*\_kan and pKFC\_*spdC* were used to construct SHM056 and SHM002  
508 respectively using a previously published method<sup>35</sup>. pJP47 was used to construct JP132  
509 using a previously published method<sup>37</sup>. The deletions, or in the case of SHM002 the  
510 integrated plasmid before recombination, were transduced to HG003 *S. aureus*. The final  
511 deletions were confirmed by colony PCR and sequencing. Phage transductions were  
512 performed using a previously published protocol<sup>39</sup>.

513 To construct JP012 and JP065, a phage lysate was prepared from SAUSA300 JE2  
514 *sagB::Tn-erm<sup>R</sup>* from the Nebraska library and used to transduce HG003 *S. aureus* and  
515 SHM056 respectively.

516 To construct strains containing pTP63<sup>38</sup> constructs, the plasmids were first  
517 electroporated into TD011, and transformants were selected on 10 µg/mL  
518 chloramphenicol at 30°C. The pTP63 constructs were transduced from these

519 transformants into strain JP012 to produce strains JP051 and JP053 and into SHM056 to  
520 produce SHM226, JP054, JP064, and JP128. For JP061, JP062, and JP063, the pTP63  
521 constructs were first transduced into SHM002, and from there transduced into SHM056.

### 522 **Co-immunoprecipitation with Myc-tagged SpdC in *Staphylococcus aureus***

523  
524 This protocol was adapted from previously published protocols<sup>40</sup>. An overnight  
525 culture of SHM226 was diluted 1:100 into 1 L of TSB. The culture was grown at 37°C with  
526 shaking at 200 r.p.m. until  $A_{600\text{nm}} = 0.6$  and then 0.2  $\mu\text{M}$  anhydrotetracycline was added  
527 to induce plasmid expression. After a 3 h induction, cells were pelleted at 5000xg, 15  
528 minutes, 4°C. Cell pellets were then resuspended in lysis buffer (1X PBS (pH 7.4), 20  $\mu\text{g}$   
529  $\text{mL}^{-1}$  DNase and RNase, 10  $\mu\text{g}$   $\text{mL}^{-1}$  lysostaphin, 5 mM  $\text{MgCl}_2$ ) and incubated at 37°C for  
530 1 h. In samples treated with a chemical crosslinker, 0.5 mM DSP was added to the mixture  
531 for 1 h and then quenched with 20 mM Tris (pH 7.5). After cooling on ice, cells were lysed  
532 with a French press two times at 20,000 psi on a high ration setting. Unbroken cells were  
533 then removed by centrifugation at 10,000xg, 4°C, 15 min. Membranes were pelleted by  
534 ultracentrifugation at 100,000xg, 4°C for 60 minutes in a Beckman 45Ti rotor. For  
535 solubilization, membrane pellets were resuspended in buffer B (1X PBS (7.4), 500 mM  
536 NaCl, 1% Triton X-100). Cell membranes were then rocked at 4°C overnight before  
537 insoluble cell debris was removed by ultracentrifugation at 100,000xg, 4°C, 30 minutes.  
538 Equilibrated magnetic anti-Myc beads (Clontech, Catalog #635699) were then added to  
539 the solubilized membranes and rocked at 4°C overnight. Equilibrated beads were then  
540 washed three times with wash buffer (1X PBS pH 7.4, 200 mM NaCl, 1% Triton X-100).  
541 Protein was eluted with elution buffer provided in the Myc Immunoprecipitation kit  
542 (Clontech, Catalog # 635698). Elution buffer was then neutralized with 1 N NaOH before

543 running on a 4-20% SDS-PAGE gel. Protein bands were prepared for LC-MS-MS  
544 analysis, adapted from previous protocols. Protein bands were excised from the gel and  
545 stored in deionized H<sub>2</sub>O prior to submission for LC-MS-MS analysis at the Taplin Mass  
546 Spectrometry Facility, Harvard Medical School.

#### 547 **Spot dilution assay**

548 Overnight cultures were diluted 1:100 into 3 mL TSB and grown at 30 °C with  
549 aeration until mid-log phase. Cultures were then diluted to OD<sub>600</sub> = 0.5. Five 10-fold serial  
550 dilutions of the resulting cultures were prepared for each strain, and 5 µL of each dilution  
551 was spotted on TSA plates with or without 0.4 µM anhydrotetracycline inducer and, where  
552 indicated, 0.8 µg/mL tunicamycin or 1 µg/mL lysostaphin. Plates were imaged after  
553 approximately 16 hours of incubation at 30 °C. Strains HG003 wild-type, SHM056, JP012,  
554 JP051, JP053, JP054, JP061, JP062, JP063, JP064, JP065, and JP128 were used for  
555 these assays.

#### 556 **Cloning, expression, and purification of *S. aureus* glucosaminidases and SpdC** 557 **variants**

##### 558 **Cloning of *S. aureus* glucosaminidases and SpdC**

559 Genes encoding SagA (SAV2307), SagB (SAOUHSC\_01895), and SpdC  
560 (SAOUHSC\_02611) were amplified by PCR from *Staphylococcus aureus* strain NCTC  
561 8325 genomic DNA. For co-expression, SagB and SpdC were cloned into a pDUET  
562 containing an amino-terminal SUMO-fusion followed by a Flag epitope tag and a carboxy-  
563 terminal hexa-histidine tag in another site. SagB and SpdC were amplified using  
564 F\_SagB/R\_SagB and F\_SpdC/R\_SpdC, and ligated into the pDUET, using primers  
565 F\_DUET\_SagB/R\_DUET\_SagB and F\_DUET\_FLAG\_SpdC/R\_DUET\_FLAG\_SpdC in  
566 two steps using Gibson assembly (New England Biolabs, # E2611L). Similar methods  
567  
568



569 were used for SagA and SpdC co-purification. Oligonucleotide primers were purchased  
570 from Eton Bio.

### 571 **Expression and co-purification of full-length, wild-type *S. aureus* SagB and SpdC**

572  
573 For co-expression of *S. aureus* SagB and SpdC, overnight cultures of BL21(DE3)  
574 *E. coli* containing pDUET-SUMO-FLAG-SpdC and SagB-His<sub>6</sub> and an arabinose-inducible  
575 Ulp1 protease plasmid<sup>3</sup> (pAM174) were diluted 1:100 into terrific broth supplemented with  
576 50 µg ml<sup>-1</sup> carbenicillin and 35 µg ml<sup>-1</sup> chloramphenicol. Cultures were grown at 37°C with  
577 shaking at 200 r.p.m. until A<sub>600nm</sub> = 0.6 and then shifted to 18°C. At an A<sub>600nm</sub> = 1.0, protein  
578 expression was induced by addition of 0.5 mM isopropyl-β-D-thiogalactoside (IPTG) for  
579 SagB and SpdC expression, and 0.2% arabinose for Ulp1 expression. After a 18 h  
580 expression, cells were collected by centrifugation and resuspended in buffer containing  
581 50 mM Tris-HCl (pH 7.4), 300 mM NaCl, 1 mM phenylmethylsulfonyl fluoride (PMSF), 1  
582 cOmplete protease inhibitor table (Sigma-Aldrich), 50 µg/ml DNase 1. Resuspended cells  
583 were lysed by a 4x passage through an Emulsiflex C3 homogenizer (Avestin) at 15,000  
584 p.s.i. Lysed cells were separated from unbroken cells by centrifugation at 12,000g, 4°C  
585 for 10 minutes. Membranes were pelleted by ultracentrifugation at 100,000g, 4°C for 60  
586 minutes in a Beckman 45Ti rotor. For solubilization, membrane pellets were resuspended  
587 in buffer B (50 mM Tris-HCl (7.4), 300 mM NaCl, 10% glycerol), homogenized using an  
588 IKA T18 UltraTurrax, and then supplemented with 1% w/v dodecyl-maltoside (DDM;  
589 Anatrace). Cell membranes were rocked at 4°C for 1 hour before insoluble cell debris was  
590 removed by ultracentrifugation at 100,000xg, 4°C, 30 minutes. Equilibrated Ni-NTA  
591 agarose (equilibrated with buffer B supplemented with 10 mM imidazole; Qiagen) was  
592 resuspended with solubilized membranes and rocked at 4°C for 1 hour before gravity flow

593 through a column. Following flow-through, resin was washed with 20 column volumes (cv)  
594 of buffer B supplemented with 10 mM imidazole and 0.05% DDM and then 20 cv of buffer  
595 B with 30 mM imidazole and 0.05% DDM. Protein was eluted with 4 cv buffer B with 200  
596 mM imidazole, 0.05% DDM, and 2 mM CaCl<sub>2</sub>. Elution fractions were then loaded onto a  
597 4 mL M1-anti-Flag antibody affinity resin using gravity flow twice. The resin was then  
598 washed with 100 ml buffer containing 50 mM HEPES (pH 7.5), 300 mM NaCl, 10%  
599 glycerol, 0.05% DDM, and 2 mM CaCl<sub>2</sub>. Protein was eluted in 20 mM HEPES (pH 7.5),  
600 500 mM NaCl, 20% glycerol, 0.1% DDM supplemented with 5 mM EDTA and 0.2 mg ml<sup>-1</sup>  
601 <sup>1</sup> Flag peptide (Genescript). SagB-SpdC was concentrated using a 50 MWCO  
602 concentrator (Amicon) and further purified by size exclusion chromatography on a  
603 Sephadex S200 Increase 10/300 GL (GE Healthcare) in buffer (for biochemical reactions,  
604 buffer contained 50 mM Tris-HCl (7.4), 300 mM NaCl, 10% glycerol, 0.1% DDM; for  
605 crystallography, buffer contained 50 mM Tris-HCl (7.4), 300 mM NaCl, 3% glycerol,  
606 0.02% DDM). For biochemical reconstitutions, SagB-SpdC was concentrated into  
607 approximately 2 mg ml<sup>-1</sup> aliquots, flash-frozen with liquid nitrogen, and stored at -80°C.  
608 The attempted purification of SagA-SpdC used a similar protocol, with the expression  
609 plasmid containing SagA-His<sub>6</sub> in place of SagB.

#### 610 **Expression and purification of *S. aureus* individual glucosaminidases and SpdC**

611 Individual SagB-His<sub>6</sub>, SagA-His<sub>6</sub>, and FLAG-SpdC were expressed and purified in  
612 a similar manner as described above with the following modifications. Overnight culture  
613 of BL21(DE3) *E. coli* containing the plasmid with SagA, SagB, or SpdC was diluted 1:100  
614 in terrific broth supplemented with 0.1% glucose and 50 µg ml<sup>-1</sup> carbenicillin. Growth  
615 conditions and initial purification steps were similar to as described above, with the  
616 exception of using a Ni\_NTA resin to bind and purify individual hydrolases and the M1-

617 anti-FLAG resin to bind and purify SpdC. After elution from respective resin, protein was  
618 concentrated using a 30 MWCO concentrator and further purified using a Sephadex 200  
619 10/300 GL column using buffer containing 50 mM Tris-HCl (pH 7.4), 300 mM NaCl, 0.1%  
620 DDM, 10% glycerol.

621 For the soluble SagB construct, protein was expressed and purified in the same  
622 manner with slight modifications. Overnight cultures of BL21 (DE3) *E. coli* containing a  
623 pET\_28(b)+ with SagB lacking its transmembrane helix (32-284 aa) was diluted 1:100 in  
624 LB. Cells were grown at 37°C at 200 r.p.m. until  $A_{600nm}=0.4$  and then cooled to 18°C; at  
625  $A_{600nm}=0.6$ , protein expression was induced with 0.5 mM IPTG. After 18 hr expression,  
626 cells were collected by centrifugation and lysed as described above. After lysis, unbroken  
627 cell debris was removed by centrifugation at 12,000g, 4°C for 10 minutes. Supernatant  
628 was further clarified by ultracentrifugation at 100,000g, 4°C for 30 minutes. Ni-NTA resin  
629 was equilibrated with clarified supernatant for 1 hour, rocking at 4°C. Following flow-  
630 through, resin was washed with 20 column volumes (cv) of buffer B supplemented with  
631 10 mM imidazole and then 20 cv of buffer B with 30 mM imidazole. Protein was  
632 concentrated using a 10 MWCO concentrator tube (Amicon) and then further purified  
633 using size exclusion chromatography with Sephadex 75 10/300 GL and a buffer  
634 containing 50 mM Tris-HCl (pH 7.4), 300 mM NaCl, 10% glycerol. Aliquots of  
635 concentrated soluble SagB at approximately 2-4 mg ml<sup>-1</sup> were then flash-frozen with liquid  
636 nitrogen and stored at -80°C.

637 **Expression and purification of *S. aureus* SagB with truncated SpdC (1-256 amino**  
638 **acids)**

639 *S. aureus* SagB-SpdC (1-256 amino acids) was expressed and purified in the  
640 same manner with slight modifications. Overnight cultures of BL21(DE3) *E. coli* containing

641 the pDUET with SUMO\_Flag\_SpdC (1-256 aa) and SagB-His<sub>6</sub>, and an arabinose-  
642 inducible Ulp1 protease plasmid (pAM174) were diluted 1:100 in terrific broth  
643 supplemented with 0.1% glucose. Cultures were grown at 30°C with shaking at 200 r.p.m.  
644 until A<sub>600nm</sub> = 0.6 and then shifted to 24°C. At an A<sub>600nm</sub> = 1.1, protein expression was  
645 induced by addition of 0.5 mM isopropyl-β-D-thiogalactoside (IPTG) for SagB and SpdC  
646 expression, and 0.2% arabinose for Ulp1 expression and grown for 16 h. Purification of  
647 SagB-SpdC was similar to as described above.

648

#### 649 **Expression and purification of *S. aureus* SagB-SpdC cysteine mutants**

650 The *S. aureus* SagB-SpdC cysteine mutants were expressed and purified in the  
651 same manner with slight modifications. Overnight cultures of BL21(DE3) *E. coli* containing  
652 the pDUET with SUMO\_Flag\_SpdC and SagB-His<sub>6</sub> with the cysteine mutants, and an  
653 arabinose-inducible Ulp1 protease plasmid (pAM174) were diluted 1:100 in terrific broth  
654 supplemented with 0.1% glucose. Cultures were grown at 25°C with shaking at 200 r.p.m  
655 until A<sub>600nm</sub> = 0.6 and then shifted to 20°C. At an A<sub>600nm</sub> = 1.1, protein expression was  
656 induced by addition of 0.5 mM isopropyl-β-D-thiogalactoside (IPTG) for SagB and SpdC  
657 expression, and 0.2% arabinose for Ulp1 expression and grown for 16 hours. Purification  
658 of SagB-SpdC was similar to as described above with the following modifications.  
659 Pelleted cells were resuspended in 50 mM Tris-HCl (pH 7.4), 300 mM NaCl, 1 mM  
660 phenylmethylsulfonyl fluoride (PMSF), 1 cOmplete protease inhibitor table (Sigma-  
661 Aldrich), 50 µg/ml DNase 1. To facilitate disulfide formation, 0.3 mM CuSO<sub>4</sub> and 0.3 mM  
662 1,10-phenanthroline were added to the mixture. The remaining purification steps followed  
663 those described above.

#### 664 **PAGE autoradiograph experiments with PG oligomers and *S. aureus* hydrolases**

665           The protocol for analyzing and preparing peptidoglycan oligomers was adapted  
666 from similar methods previously reported<sup>17,41</sup>. A PBP2 construct<sup>19</sup> (59-716 amino acids,  
667 1  $\mu$ M) was incubated with synthetic-[<sup>14</sup>C]-Lipid II analog<sup>18</sup> (20  $\mu$ M in DMSO; specific  
668 activity=300  $\mu$ Ci/ $\mu$ mol from UDP-[<sup>14</sup>C]-GlcNAc (American Radiolabeled Chemicals, Inc.)  
669 in reaction buffer (50 mM MES (6.5), 100 mM CaCl<sub>2</sub>) with 20% DMSO (v/v). After mixing  
670 the Eppendorf tube by flicking and spinning down the reaction mixture, polymerization  
671 proceeded at room temperature for 2 hours. To test oligomers prepared from SgtB\*  
672 (SgtB<sup>Y181D</sup>)<sup>30</sup>, similar conditions were set up with 800 nM SgtB\*. Proteins were removed  
673 by precipitation by heating the reaction mixture at 95 °C for 10 minutes and then spinning  
674 down the precipitated protein. The PG oligomers were then aliquoted into separate  
675 Eppendorf tubes (10  $\mu$ l mixture for each reaction) and a hydrolase (SagA, SagB, SagB-  
676 SpdC, or the  $\Delta$ TM-SagB; 3  $\mu$ M) was added. For reactions in which the individual  
677 hydrolase was incubated with SpdC, the hydrolase SagA or SagB (3  $\mu$ M) were added to  
678 SpdC (3  $\mu$ M) for 1 hour on ice before addition to the PG mixture. After overnight  
679 incubation, the reaction was quenched with heat inactivation (95 °C for 10 minutes) and  
680 the reactions were dried completely using a speed vacuum. Reactions were resuspended  
681 in 10  $\mu$ l of SDS loading buffer and loaded onto a 10% acrylamide-Tris gel. The gel was  
682 run at 30 mA for 5 h at 4°C; an anode buffer consisted of 100 mM Tris (pH 8.8) and  
683 cathode buffer consisted of 100 mM Tris, 100 mM tricine (pH 8.25), 0.1% SDS<sup>41</sup>. Gels  
684 were dried on filter paper (19 x 18.5 cm; Biorad) and then exposed to a phosphor screen  
685 for at least 24 h. Phosphor screens were imaged using an Azure Sapphire Biomolecular  
686 Imager (Azure biosystems). Images were further analyzed using ImageJ.



687 Reactions to test hydrolase activities with concurrent PBP2 transglycosylase  
688 activity were set up and analyzed in a similar manner with some modifications. A reaction  
689 mixture was prepared with synthetic-[<sup>14</sup>C]-Lipid II analog<sup>18</sup> (20 μM in DMSO; specific  
690 activity=300 μCi μmol<sup>-1</sup> from UDP-[<sup>14</sup>C]-GlcNAc (American Radiolabeled Chemicals,  
691 Inc.), reaction buffer (50 mM MES (6.5), 100 mM CaCl<sub>2</sub>), 20% DMSO (v/v). PBP2 (59-  
692 716 amino acids; 5 μM) and the hydrolase (SagA, SagB, SagB-SpdC; 3 μM) was then  
693 added). Similar methods were used to test the activities of interface mutants of SagB-  
694 SpdC. To test the activities of disulfide-linked SagB-SpdC complexes, protein under  
695 reducing conditions were treated with 5 mM DTT on ice for 30 minutes before the addition  
696 to the reaction mixture that included the addition of 5 mM DTT. After overnight incubation,  
697 the reaction was quenched with heat inactivation (95 °C for 10 minutes) and the reactions  
698 were dried completely using a speed vacuum. Reactions were resuspended in 10 μl of  
699 2x SDS loading buffer and loaded onto a 10% acrylamide-Tris gel. The gel was run and  
700 analyzed as described above.

701 Testing hydrolase activities with wall-teichoic acid labeled peptidoglycan oligomers  
702 was adapted from similar methods previously reported<sup>36</sup>. Peptidoglycan oligomers were  
703 prepared as described above although with unlabeled, synthetic-Lipid II (20 μM). After  
704 precipitation to remove the PGT, a portion of the mixture was incubated with TagT (1 μM)  
705 and [<sup>14</sup>C]-LII<sup>A</sup><sup>WTA</sup> (8 μM) for four hours at room temperature. The TagT ligase was then  
706 heat inactivated, precipitated, and removed from the reaction mixture. The resulting wall  
707 teichoic acid-labeled oligomers were then incubated with SagB (3 μM), SagB-SpdC (3  
708 μM), or mutanolysin (2.5 U ml<sup>-1</sup>). The remaining portion of unlabeled PG oligomers was  
709 also incubated with the SagB-SpdC complex (3 μM). After an overnight incubation at room

710 temperature, the reaction was quenched with heat inactivation (95 °C for 10 minutes). To  
711 test TagT ligation after SagB-SpdC incubation, TagT (1 μM) and [<sup>14</sup>C]-LII<sup>WTA</sup> (8 μM) was  
712 added to the respective reaction for four additional hours. Reactions were dried  
713 completely using a speed vacuum and the mixture was re-dissolved in 10 μl of 2x SDS  
714 loading buffer and loaded onto a 10% acrylamide-Tris gel. The gel was run and analyzed  
715 as described above.

716 **Western blot analysis of hydrolase activities with peptidoglycan oligomers**  
717 **prepared from *S. aureus* Lipid II**

718 The protocol for detecting peptidoglycan oligomers prepared from extracted *S.*  
719 *aureus* Lipid II was adopted from similar methods previously reported<sup>19,23,29</sup>. To generate  
720 uncrosslinked PG oligomers, *S. aureus* Lipid II (10 μM) was added to reaction buffer (50  
721 mM MES (6.5), 10 mM CaCl<sub>2</sub>), 20% DMSO (v/v) and the transpeptidase inactive construct  
722 PBP2<sup>S398G</sup> (5 μM) was added to the reaction. To test ongoing hydrolase and polymerase  
723 activity, the reaction mixture was aliquoted into separate tubes and the respective  
724 glucosaminidase was also added (SagA, SagB, or SagB-SpdC; 3 μM). For a mutanolysin-  
725 digest reaction, 2.5 U ml<sup>-1</sup> of mutanolysin (Sigma-Aldrich) was added<sup>42</sup>. If testing  
726 hydrolase activity with pre-assembled PG oligomers, PBP2<sup>S398G</sup> was precipitated after  
727 heat inactivation at 95°C. PG oligomers were aliquoted into separate 10 μl reactions, and  
728 the hydrolase was added as described above. Reactions were inactivated at 95°C for 10  
729 minutes. To label uncrosslinked PG oligomers, BDL (4 mM in H<sub>2</sub>O) and *E. faecalis* PBPX<sup>31</sup>  
730 (20 μM) was added to the reaction mixtures. After a 1 h incubation at room temperature,  
731 2x loading buffer was added to quench the reactions. To generate crosslinked PG, *S.*  
732 *aureus* Lipid II (10 μM) was added to reaction buffer (50 mM MES (6.5), 10 mM CaCl<sub>2</sub>),  
733 20% DMSO (v/v), BDL (4 mM), and a wild type PBP2 construct (5 μM). After the addition

734 of PBP2, the respective glucosaminidase was also added (SagB or SagB-SpdC; 3  $\mu$ M)  
735 and the reactions were incubated at room temperature for 5 hours. Reactions were split  
736 into two aliquots after heat inactivation at 95°C, and lysostaphin (100  $\mu$ g ml<sup>-1</sup>) was added  
737 to one aliquot and then incubated at 37°C for 2 hours. 2x loading dye was added to each  
738 reaction, and these mixtures were loaded onto a 4-20% polyacrylamide gel which ran at  
739 175 V for 1 h. The gel was transferred to PVDF membrane (Biorad) at 10 mV for 1 h. After  
740 incubating with starting block (Thermo Scientific, catalog number #37578), the membrane  
741 was rocked with HRP-streptavidin (1:5000) in TBS-T and then washed repetitively. The  
742 membrane was imaged using the chemiluminescence function on an Azure imager  
743 (Azure biosystems). Images were further analyzed using ImageJ.

744

#### 745 **LC-MS method for detecting digest products of *S. aureus* glucosaminidases and** 746 **mutanolysin**

747 The cleaved muropeptide products of glucosaminidase reactions (SagA, SagB,  
748 SagB-SpdC) were analyzed by adopting a previously reported LC-MS method for  
749 detecting mutanolysin-digested products<sup>42</sup>. Hydrolase reactions were prepared using  
750 synthetic Lipid II (20  $\mu$ M), reaction buffer (50 mM MES (6.5), 10 mM CaCl<sub>2</sub>), 20% DMSO  
751 (v/v), PBP2S398 (5  $\mu$ M), and then the respective hydrolase (SagA, SagB, SagB-SpdC, 3  
752  $\mu$ M) in a total volume of 50  $\mu$ l. A control mutanolysin reaction was likewise set-up with 5  
753 U ml<sup>-1</sup> mutanolysin. After an overnight incubation, sodium borohydride (10 mg ml<sup>-1</sup> in H<sub>2</sub>O;  
754 equal reaction volume) was added and incubated for 20 minutes at room temperature.  
755 The reaction was quenched with the addition of 20% phosphoric acid which also adjusted  
756 the pH to 3-4. Reactions were completely dried under a nitrogen stream and then  
757 resuspended in H<sub>2</sub>O. LC-MS analysis was conducted using an Agilent Technologies 1200

758 series HPLC in line with an Agilent 6210 TOF mass spectrometer with electrospray  
759 ionization (ESI) and operating in positive mode. Muropeptide cleavage products were  
760 separated using a Waters Symmetry Shield RP18 column (5  $\mu\text{m}$ , 3.9 x 150 mM) with a  
761 matching guard column and the following method: 0.4 mL  $\text{min}^{-1}$  solvent A (water/0.1%  
762 formic acid) for 5 minutes followed by a linear gradient of 0 to 40% solvent B  
763 (acetonitrile/0.1% formic acid) over 25 min. Mass spectrometry data was analyzed using  
764 Agilent MassHunter Workstation Qualitative Analysis software version B.06.00 and Prism  
765 7.0b.

#### 766 **LC-MS method for detecting lipid-linked PG oligomers**

767 To character lipid-linked cleavage products, we adapted previously published  
768 methods<sup>23</sup>. Peptidoglycan oligomers were prepared by incubating Lipid II (40  $\mu\text{M}$ ) with  
769 PBP2<sup>S398G</sup> (5  $\mu\text{M}$ ) in 20% DMSO and reaction buffer (50 mM MES (6.5), 100 mM  $\text{CaCl}_2$ )  
770 and 20% DMSO (v/v) for a total of 2 h. SagB-SpdC (3  $\mu\text{M}$ ) was added to the mixture and  
771 then incubated for approximately 8 hours. Enzymes were heat inactivated at 95°C for 5  
772 minutes. After cooling reactions to room temperature, ColM (1 mg  $\text{mL}^{-1}$ ) was added to the  
773 mixture and incubated for approximately 3 hours at room temperature<sup>23</sup>. Protein was  
774 precipitated with equal volume methanol. Dried reactions were then resuspended in 20  
775  $\mu\text{L}$  of  $\text{H}_2\text{O}$ .

#### 776 **Glycan strand assay**

777 Overnight cultures of wild-type HG003 *S. aureus*, SHM056, and JP132 were  
778 diluted 1:100 into 1 L of TSB each and grown at 30 °C for 5 hours. Cells were harvested  
779 and sacculi were isolated following a previously published protocol<sup>43</sup> with the modification  
780 that samples were boiled in SDS for 3 hours. Sacculi were resuspended to 5 mg/mL in

781 500  $\mu$ L of 25 mM  $\text{NaH}_2\text{PO}_4$  pH 7.0 and treated with 100  $\mu$ g/mL lysostaphin at 37  $^\circ\text{C}$  with  
782 shaking for 9 hours. LytA was then added to 100  $\mu$ g/mL and shaking continued at 37  $^\circ\text{C}$   
783 for another 14 hours. Enzymes were heat inactivated at 95  $^\circ\text{C}$  for 5 min. Proteins were  
784 precipitated with an equal volume of MeOH and removed by centrifugation. To label  
785 glycans, we adapted methods previously published<sup>44</sup>. Dried samples were resuspended  
786 in 25  $\mu$ L of 1 M 2-methylpyridine borane complex in DMSO and 25  $\mu$ L of 200 mM 8-  
787 aminonaphthalene-1,3,6-trisulfonic acid in 15% acetic acid. Reactions were incubated at  
788 room temperature overnight protected from light. Reactions were quenched with 450  $\mu$ L  
789 of  $\text{H}_2\text{O}$  at room temperature for 1 hr, and an equal volume of MeOH was added. After  
790 spinning down, the supernatants were removed to new tubes and dried. Dried samples  
791 were resuspended in 50  $\mu$ L of 1x loading buffer (125 mM Tris-tricine pH 8.2, 10% glycerol)  
792 and loaded on a 20% polyacrylamide gel, which ran for 9 hours at 25 mA. The gel was  
793 visualized under UV light at 365 nm.

#### 794 **Crystallization of SagB-SpdC<sup>1-256</sup> and data collection**

795 For crystallization trials, SagB-SpdC<sup>1-256</sup> was purified as described above. Freshly  
796 purified SagB-SpdC<sup>1-256</sup> was concentrated to 35-40 mg/ml and immediately reconstituted  
797 into lipidic cubic phase by mixing protein and monoolein (Hampton Research) at a 1:1.5  
798 ratio by mass, using the coupled syringe method<sup>27</sup>. All samples were mixed at least 100  
799 times prior to crystallization trials. The resulting mixture was dispensed onto glass plates  
800 in 35-50 nL drops, then overlaid with 600 nL precipitant solution using an NT8 robot  
801 (Formulatrix). Crystals of SagB-SpdC<sup>1-256</sup> were grown in precipitant solution containing  
802 24-32% PEG400, 500 mM  $(\text{NH}_4)_2\text{SO}_4$ , and 100mM sodium acetate or sodium citrate pH  
803 4.4-5.0; at higher pH crystallization required higher concentrations of PEG400. Most

804 crystals appeared within 36 hours of drop setting and were full-grown in 3-7 days. Crystals  
805 were harvested using mesh loops and flash-frozen in liquid nitrogen.

806 Diffraction data were collected at Argonne National Laboratory using NE-CAT  
807 beamlines 24-ID-C and 24-ID-E. Two rounds of grid scanning with large and then small  
808 beam size were used to locate crystals on the mesh and then precisely determine their  
809 positions. All data were collected at 0.979 Å. Datasets were collected 0.2-s exposure and  
810 a 0.2° oscillation angle. The presence of multiple crystals on the mesh prevented the  
811 collection of full datasets from individual crystals. Data were indexed and integrated in  
812 XDS<sup>45</sup>; the SagB-SpdC crystals belonged to the C2 space group. Diffraction data was  
813 processed using structural biology software accessed through the SBGrid consortium<sup>46</sup>.  
814 Partial datasets from five well-diffracting crystals were then scaled and merged using the  
815 CCP4 suite<sup>47</sup> program AIMLESS<sup>48</sup>.

## 816 **Structure determination and refinement**

817 The structure was determined by molecular replacement in Phaser using an  
818 unpublished structure of the soluble domain of SagB (PDB# 6FXP)<sup>20,49</sup>. We attempted to  
819 place SpdC by molecular replacement using models prepared from the structure of  
820 *Methanococcus maripaludis* CAAX protease Rce1 (PDB# 4CAD, 20% sequence identity  
821 to SpdC)<sup>50</sup>, but no good solutions were found. Following placement of soluble SagB, only  
822 weak density was visible for the transmembrane helices of the complex; those that were  
823 clearest were initially modeled as poly-alanine helices using Coot<sup>51,52</sup>. After one round of  
824 automated refinement using phenix.refine<sup>53</sup>, placement of all nine transmembrane helices  
825 was possible, but residue identities were not obvious. Initial assignment was made by  
826 sequence alignment and comparison to the structure of Rce1, which appeared to have a



827 similarly threaded transmembrane domain. Density for sidechains in the transmembrane  
828 domain became much clearer after several rounds of manual building and automated  
829 refinement, and simulated annealing composite omit maps were used to check for model  
830 bias and correct errors in the register throughout the process. Towards the end of  
831 refinement, a region of clear density remained present at a crystallographic interface  
832 between two copies of SagB near residues 38-45 and appeared to be a peptide forming  
833 a continuous  $\beta$ -sheet with the two copies of SagB. This peptide is on the unit cell edge  
834 but does not appear to be part of either protein; we think it is likely FLAG peptide that  
835 carried through the purification and may orient either direction at this interface. Water  
836 molecules, sulfate ions, PEG molecules were also added near the end of refinement.  
837 Structure quality was assessed using MolProbity<sup>54</sup>, and figures were prepared using  
838 PyMOL.

### 839 **Additional References:**

- 840 29 Qiao, Y. *et al.* Detection of lipid-linked peptidoglycan precursors by exploiting an unexpected  
841 transpeptidase reaction. *J Am Chem Soc* **136**, 14678-14681, doi:10.1021/ja508147s (2014).  
842 30 Rebets, Y. *et al.* Moenomycin resistance mutations in *Staphylococcus aureus* reduce  
843 peptidoglycan chain length and cause aberrant cell division. *ACS Chem Biol* **9**, 459-467,  
844 doi:10.1021/cb4006744 (2014).  
845 31 Welsh, M. A. *et al.* Identification of a Functionally Unique Family of Penicillin-Binding Proteins. *J*  
846 *Am Chem Soc* **139**, 17727-17730, doi:10.1021/jacs.7b10170 (2017).  
847 32 Schaefer, K., Owens, T. W., Kahne, D. & Walker, S. Substrate Preferences Establish the Order of  
848 Cell Wall Assembly in *Staphylococcus aureus*. *J Am Chem Soc* **140**, 2442-2445,  
849 doi:10.1021/jacs.7b13551 (2018).  
850 33 Flores-Kim, J., Dobihal, G. S., Fenton, A., Rudner, D. Z. & Bernhardt, T. G. A switch in surface  
851 polymer biogenesis triggers growth-phase-dependent and antibiotic-induced bacteriolysis. *Elife* **8**,  
852 doi:10.7554/eLife.44912 (2019).  
853 34 Coe, K. A. *et al.* Comparative Tn-Seq reveals common daptomycin resistance determinants in  
854 *Staphylococcus aureus* despite strain-dependent differences in essentiality of shared  
855 cell envelope genes. *bioRxiv* (2019).  
856 35 Kato, F. & Sugai, M. A simple method of markerless gene deletion in *Staphylococcus aureus*. *J*  
857 *Microbiol Methods* **87**, 76-81, doi:10.1016/j.mimet.2011.07.010 (2011).  
858 36 Do, T. *et al.* *Staphylococcus aureus* cell growth and division are regulated by an amidase that trims  
859 peptides from uncrosslinked peptidoglycan. *Nat Microbiol* **5**, 291-303, doi:10.1038/s41564-019-  
860 0632-1 (2020).  
861 37 Lee, W. *et al.* Antibiotic Combinations That Enable One-Step, Targeted Mutagenesis of  
862 Chromosomal Genes. *ACS Infect Dis* **4**, 1007-1018, doi:10.1021/acsinfecdis.8b00017 (2018).

- 863 38 Pang, T., Wang, X., Lim, H. C., Bernhardt, T. G. & Rudner, D. Z. The nucleoid occlusion factor Noc  
864 controls DNA replication initiation in *Staphylococcus aureus*. *PLoS Genet* **13**, e1006908,  
865 doi:10.1371/journal.pgen.1006908 (2017).
- 866 39 Do, T. *et al.* The cell cycle in *Staphylococcus aureus* is regulated by an amidase that controls  
867 peptidoglycan synthesis. *bioRxiv*, doi:10.1101/634089 (2019).
- 868 40 Bertsche, U. *et al.* Interaction between two murein (peptidoglycan) synthases, PBP3 and PBP1B,  
869 in *Escherichia coli*. *Mol Microbiol* **61**, 675-690, doi:10.1111/j.1365-2958.2006.05280.x (2006).
- 870 41 Barrett, D. *et al.* Analysis of glycan polymers produced by peptidoglycan glycosyltransferases. *J*  
871 *Biol Chem* **282**, 31964-31971, doi:10.1074/jbc.M705440200 (2007).
- 872 42 Lebar, M. D. *et al.* Forming cross-linked peptidoglycan from synthetic gram-negative Lipid II. *J Am*  
873 *Chem Soc* **135**, 4632-4635, doi:10.1021/ja312510m (2013).
- 874 43 Kuhner, D., Stahl, M., Demircioglu, D. D. & Bertsche, U. From cells to muropeptide structures in 24  
875 h: peptidoglycan mapping by UPLC-MS. *Sci Rep* **4**, 7494, doi:10.1038/srep07494 (2014).
- 876 44 Jackson, P. The use of polyacrylamide-gel electrophoresis for the high-resolution separation of  
877 reducing saccharides labelled with the fluorophore 8-aminonaphthalene-1,3,6-trisulphonic acid.  
878 Detection of picomolar quantities by an imaging system based on a cooled charge-coupled device.  
879 *Biochem J* **270**, 705-713, doi:10.1042/bj2700705 (1990).
- 880 45 Kabsch, W. Xds. *Acta Crystallogr D Biol Crystallogr* **66**, 125-132,  
881 doi:10.1107/S0907444909047337 (2010).
- 882 46 Morin, A. *et al.* Collaboration gets the most out of software. *Elife* **2**, e01456,  
883 doi:10.7554/eLife.01456 (2013).
- 884 47 Winn, M. D. *et al.* Overview of the CCP4 suite and current developments. *Acta Crystallogr D Biol*  
885 *Crystallogr* **67**, 235-242, doi:10.1107/S0907444910045749 (2011).
- 886 48 Evans, P. R. & Murshudov, G. N. How good are my data and what is the resolution? *Acta*  
887 *Crystallogr D Biol Crystallogr* **69**, 1204-1214, doi:10.1107/S0907444913000061 (2013).
- 888 49 McCoy, A. J. *et al.* Phaser crystallographic software. *J Appl Crystallogr* **40**, 658-674,  
889 doi:10.1107/S0021889807021206 (2007).
- 890 50 Manolaridis, I. *et al.* Mechanism of farnesylated CAAX protein processing by the intramembrane  
891 protease Rce1. *Nature* **504**, 301-305, doi:10.1038/nature12754 (2013).
- 892 51 Emsley, P. & Cowtan, K. Coot: model-building tools for molecular graphics. *Acta Crystallogr D Biol*  
893 *Crystallogr* **60**, 2126-2132, doi:10.1107/S0907444904019158 (2004).
- 894 52 Emsley, P., Lohkamp, B., Scott, W. G. & Cowtan, K. Features and development of Coot. *Acta*  
895 *Crystallogr D Biol Crystallogr* **66**, 486-501, doi:10.1107/S0907444910007493 (2010).
- 896 53 Adams, P. D. *et al.* PHENIX: a comprehensive Python-based system for macromolecular structure  
897 solution. *Acta Crystallogr D Biol Crystallogr* **66**, 213-221, doi:10.1107/S0907444909052925 (2010).
- 898 54 Chen, V. B. *et al.* MolProbity: all-atom structure validation for macromolecular crystallography. *Acta*  
899 *Crystallogr D Biol Crystallogr* **66**, 12-21, doi:10.1107/S0907444909042073 (2010).
- 900
